# Supplementary material for: Synthesis, Molecular Docking, and Neuroprotective Effect of 2-Methylcinnamic Acid Amide in 1-methyl-4-phenyl-1,2,3,6-tetrahydropyridine (MPTP)—An Induced Parkinson’s Disease Model
Source: MDPI journal article supplement (doi:10.3390/cryst12111518), 2022-10-25
Supplement: s1 [file s1]

Archive with 2 entries (2 files):
- crystals-1933855-checkcif._merged_2205297.pdf
- crystals-1933855-supplementary.pdf
